# Supplementary material for: Synthesis of Optically and Redox Active Polyenaminones from Diamines and α,α’-Bis[(dimethylamino)methylidene]cyclohexanediones
Source: MDPI journal article supplement (doi:10.3390/polym14194120), 2022-10-01

Supplementary material

## Synthesis of Optically and Redox Active Polyenaminones from Diamines and $\alpha,\alpha'$ -Bis[(dimethylamino)methyldene]cyclohexanediones.

Urša Štanfel <sup>1</sup>, Tomaž Kotnik <sup>1</sup>, Sebastijan Ričko <sup>1</sup>, Uroš Grošelj <sup>1</sup>, Bogdan Štefane <sup>1</sup>, Klemen Pirnat <sup>3</sup>, Ema Žagar <sup>2</sup>, Boštjan Genorio <sup>1\*</sup> and Jurij Svete <sup>1,\*</sup>

<sup>1</sup> University of Ljubljana, Faculty of Chemistry and Chemical Technology, Večna pot 113, 1000 Ljubljana, Slovenia

<sup>2</sup> National Institute of Chemistry, Department of Materials Chemistry, Hajdrihova 19, 1000 Ljubljana, Slovenia

<sup>3</sup> National Institute of Chemistry, Department of Polymer Chemistry and Technology, Hajdrihova 19, 1000 Ljubljana, Slovenia

### Table of contents

|                                                                                                      |      |
|------------------------------------------------------------------------------------------------------|------|
| 1. Copies of <sup>1</sup> H NMR and <sup>13</sup> C NMR Spectra of Compounds <b>2</b> and <b>4</b> . | 2–4  |
| 2. Copies of IR spectra of compounds <b>2</b> and <b>4</b> .                                         | 5–13 |
| 3. Copies of UV-VIS spectra of compounds <b>4aa–4af</b> and <b>4ba–4bf</b> .                         | 9–14 |

# 1. Copies of $^1\text{H}$ NMR and $^{13}\text{C}$ NMR Spectra of Compounds 2 and 4.

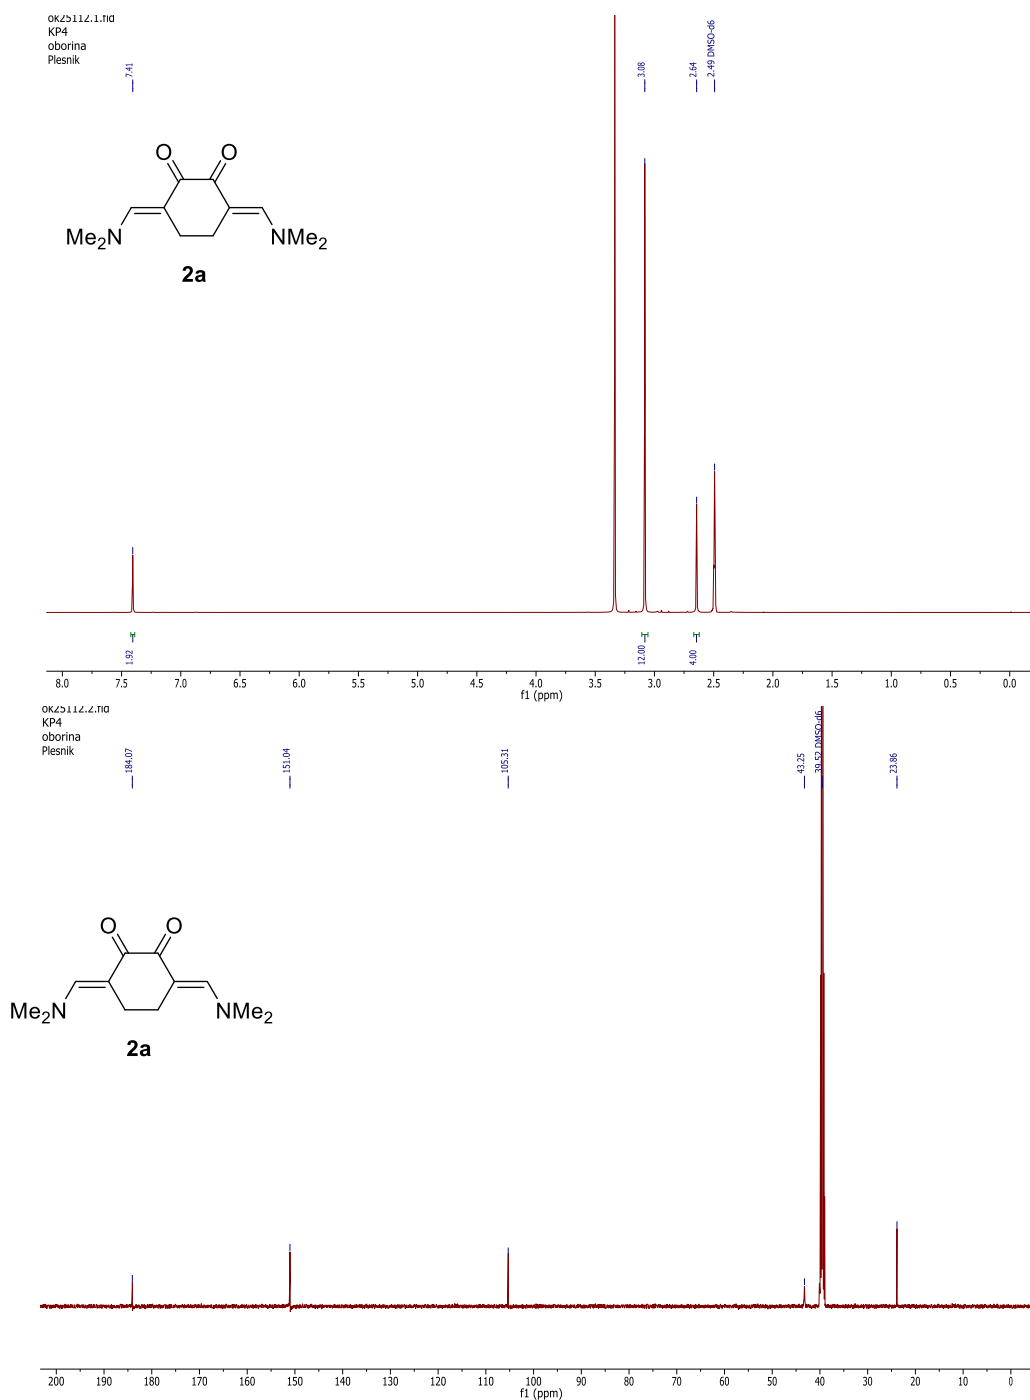

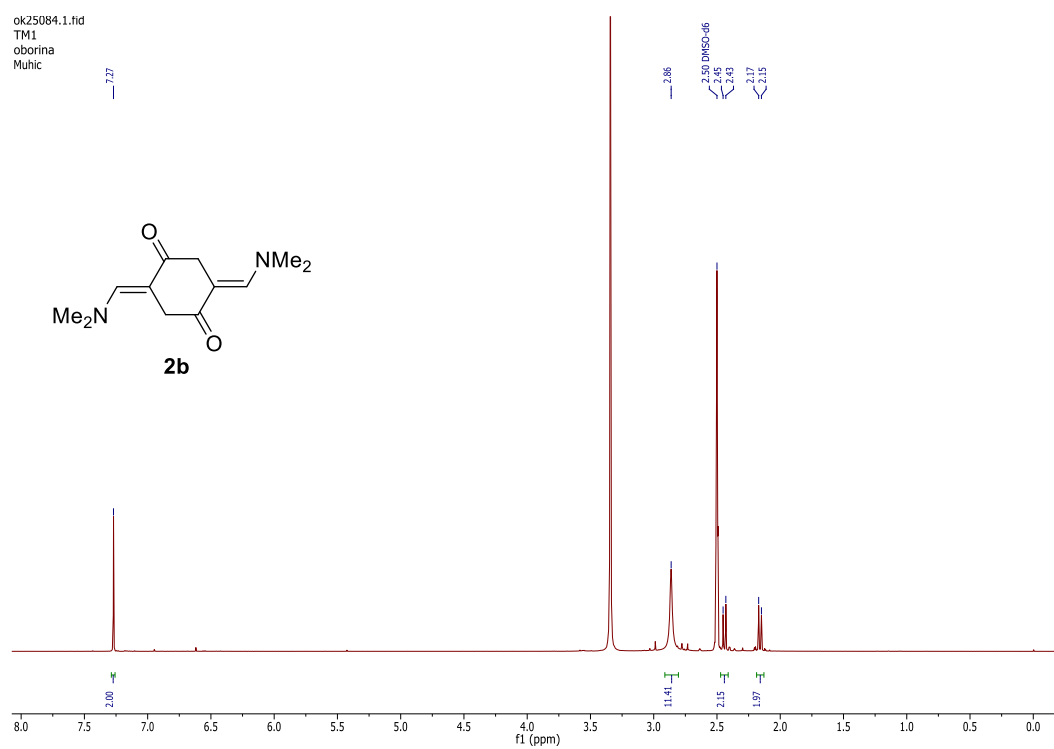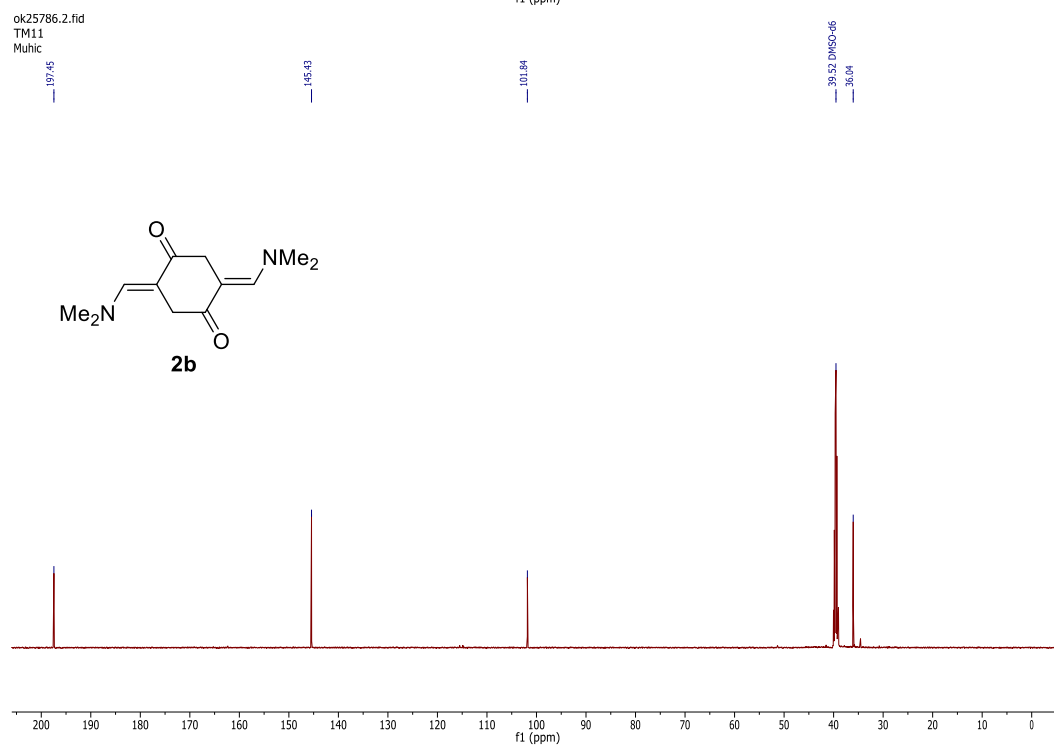

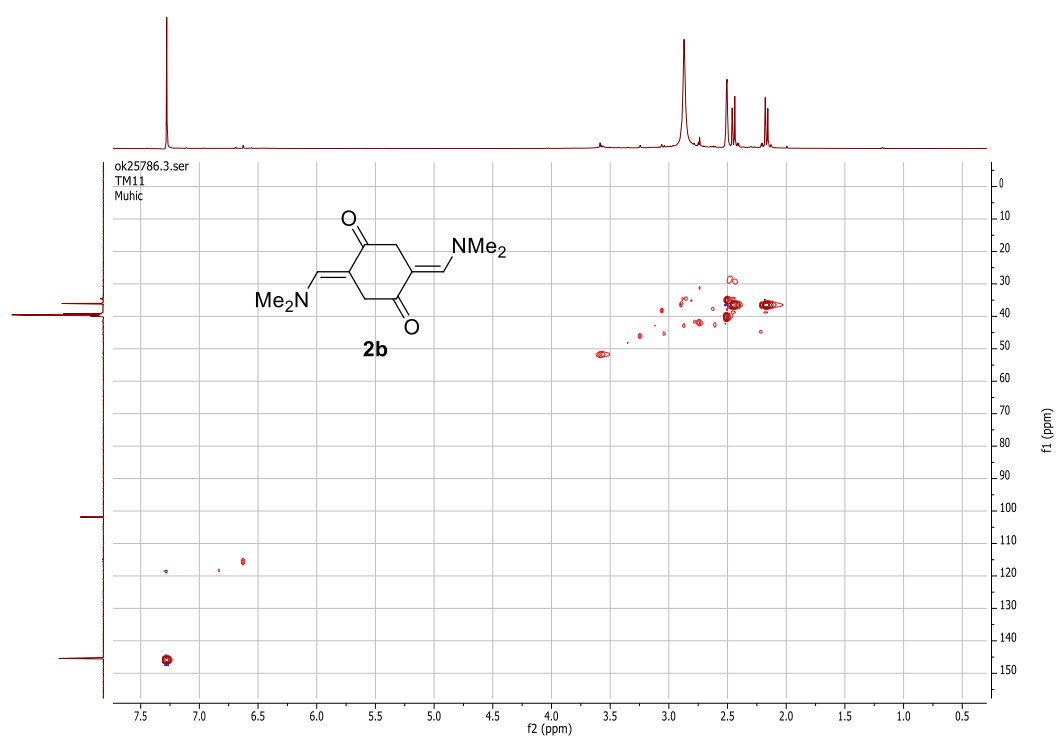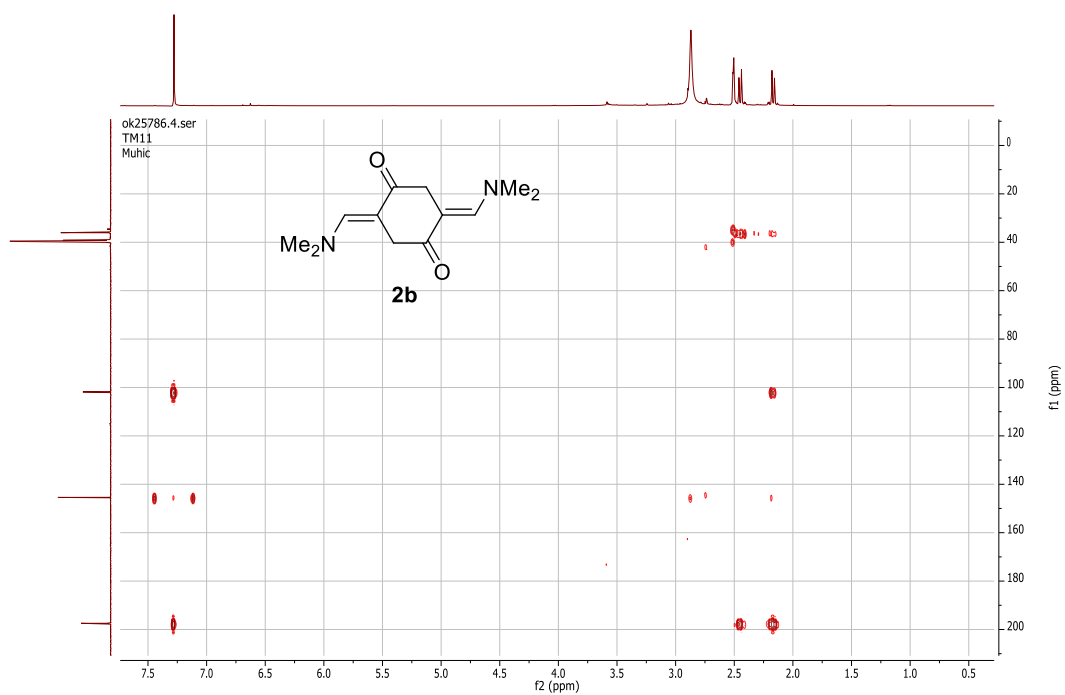

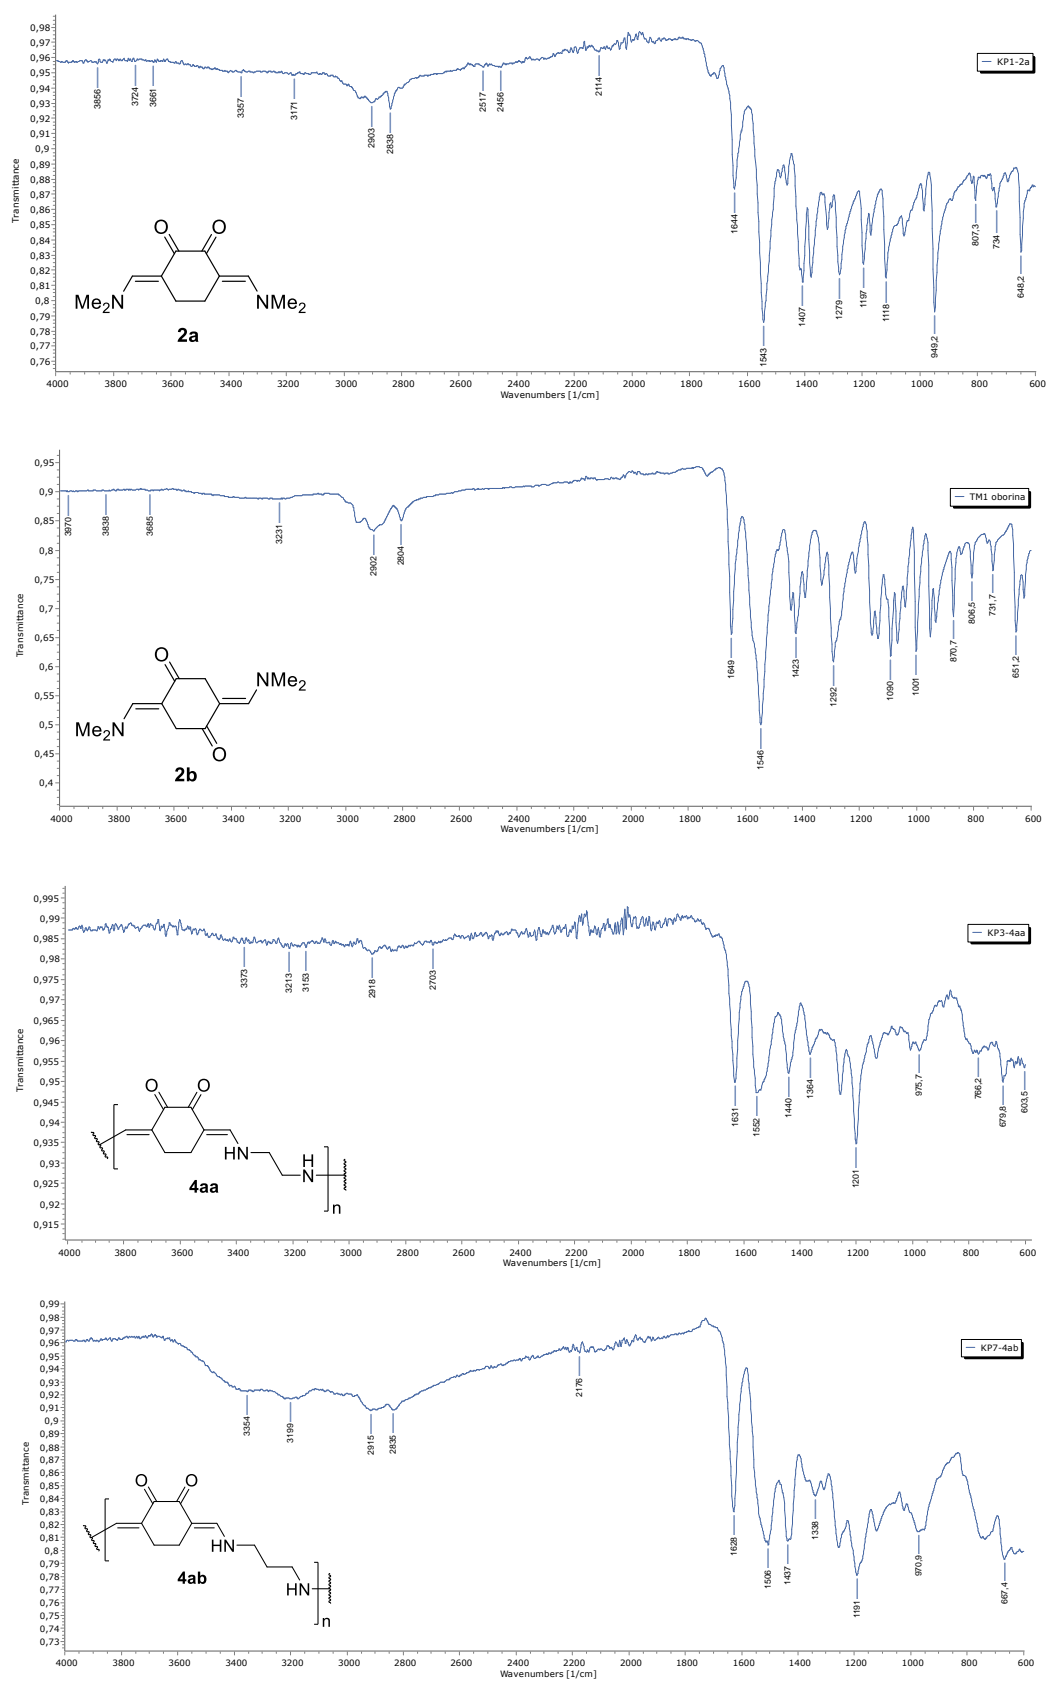

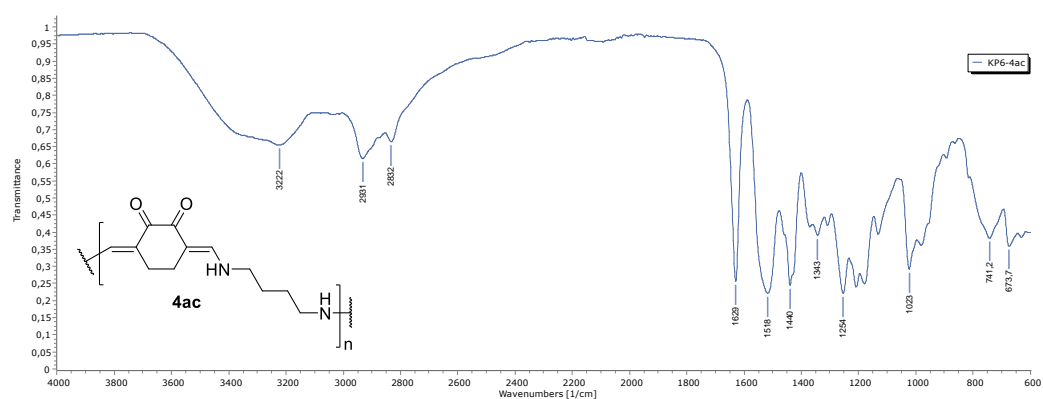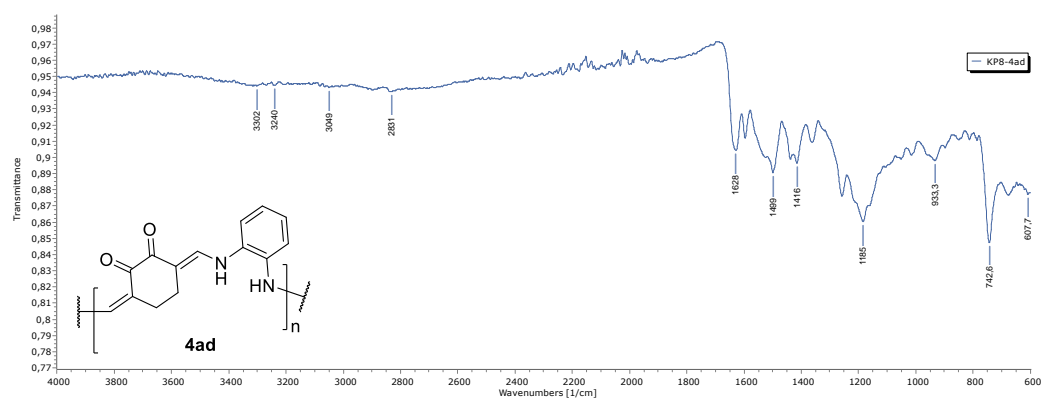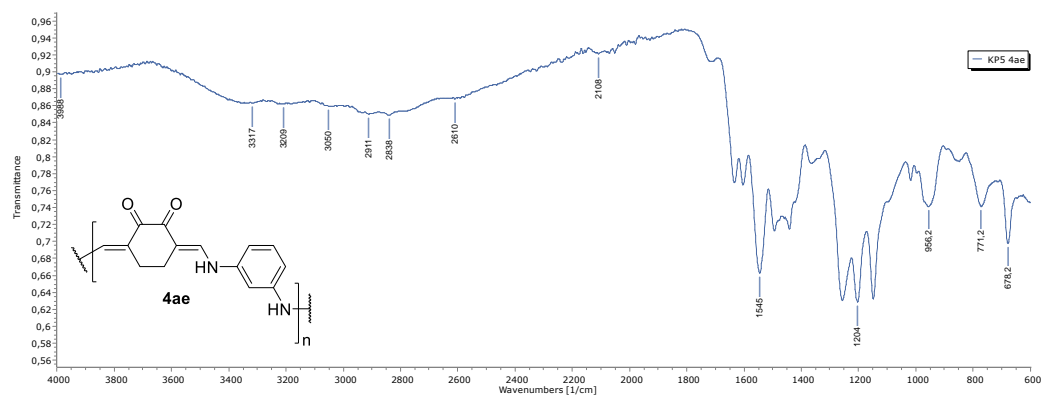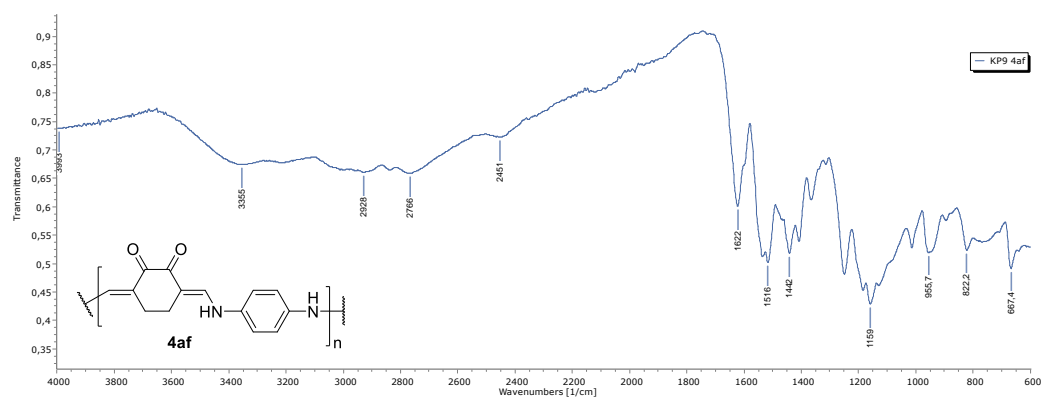

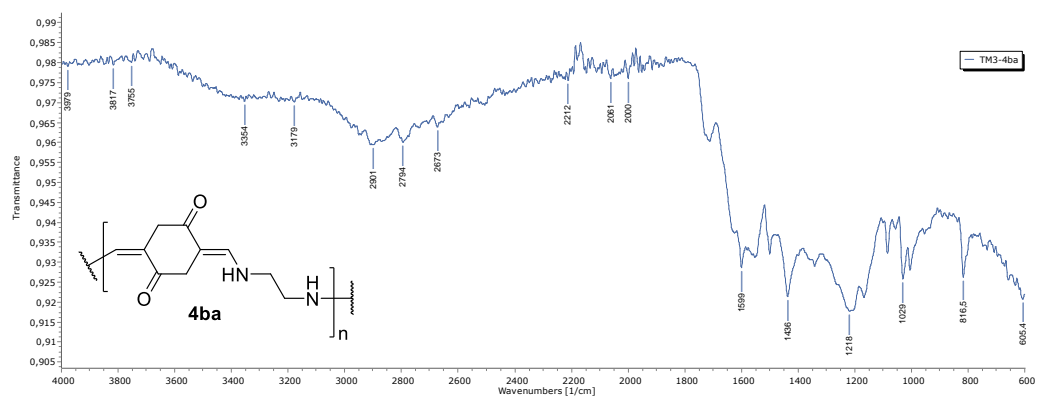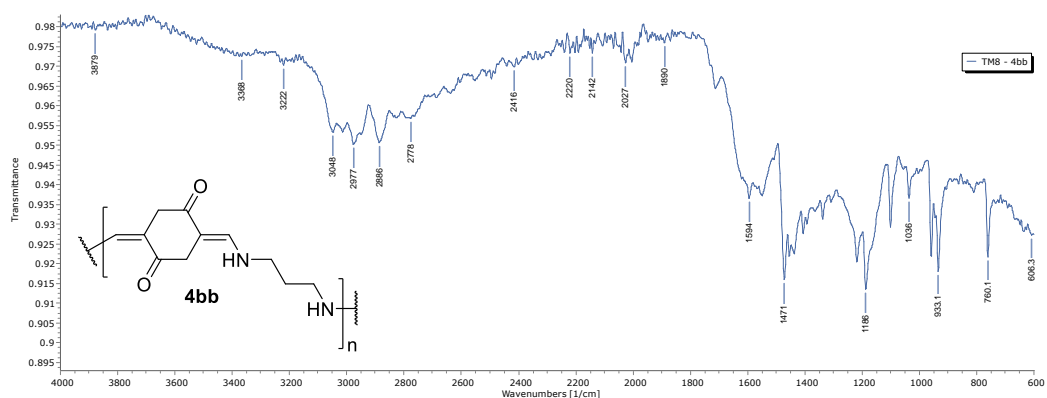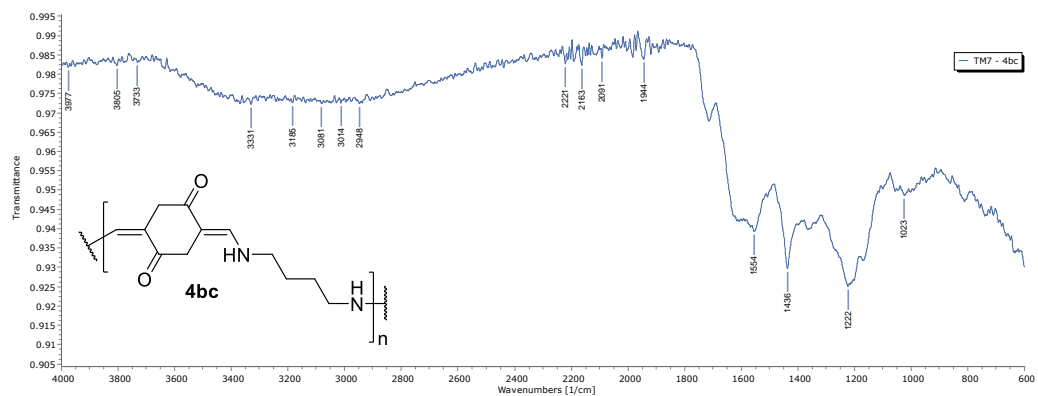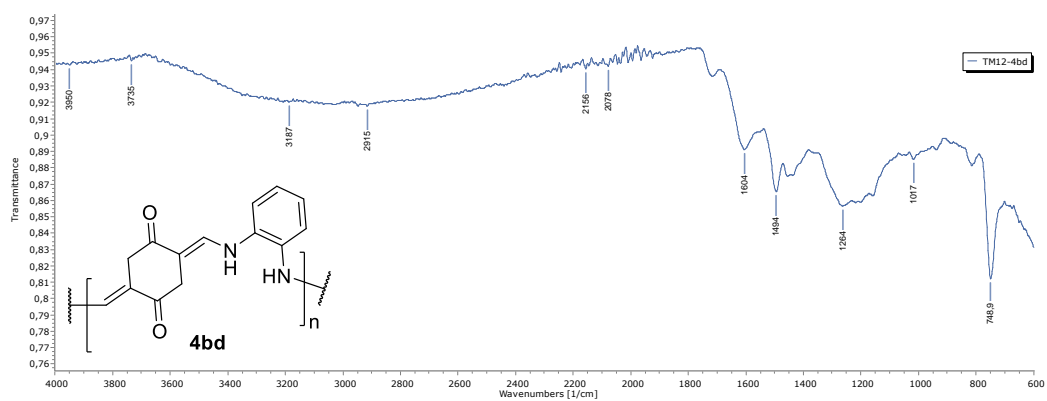

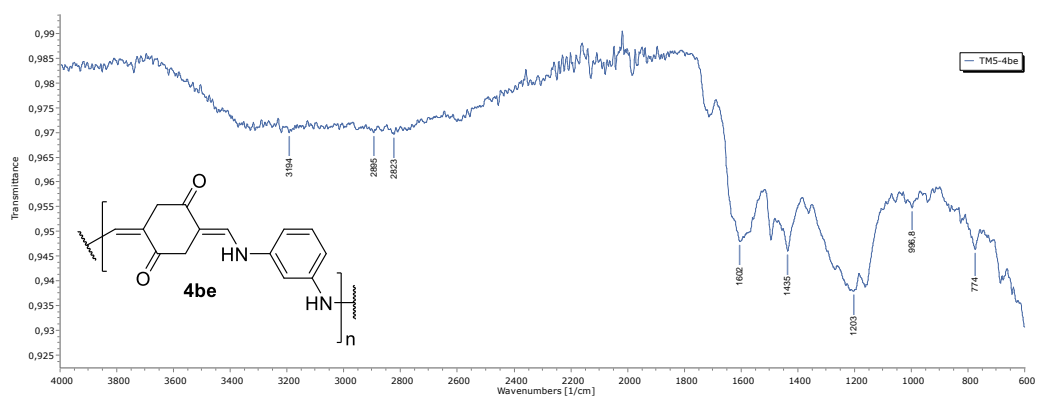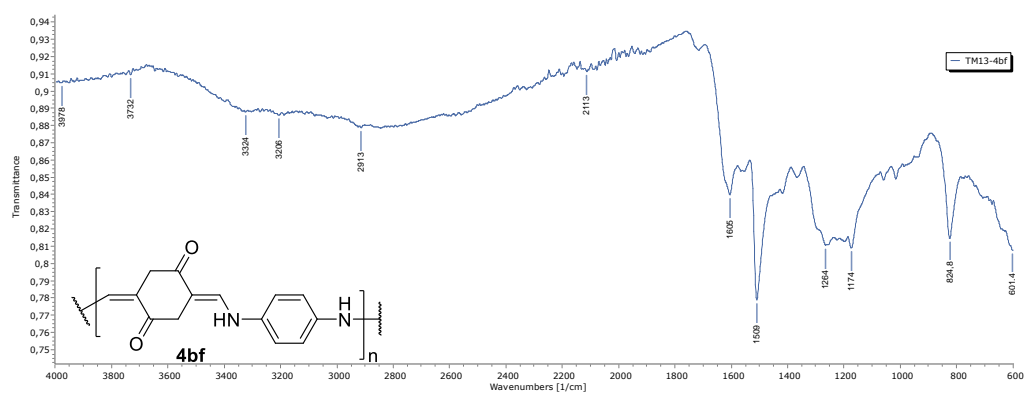



### 3. Copies of UV-VIS spectra of compounds 4aa–4af and 4ba–4bf.

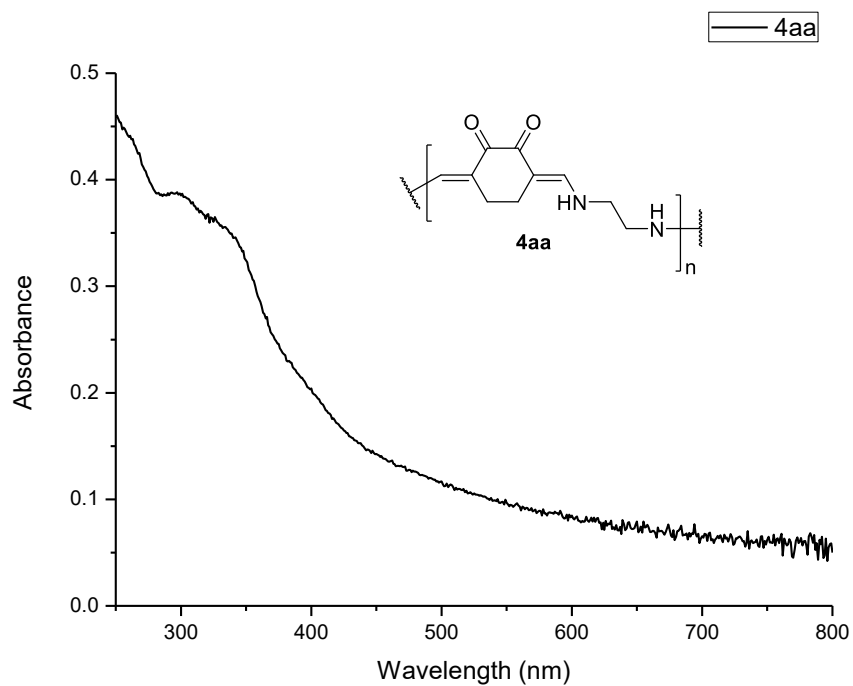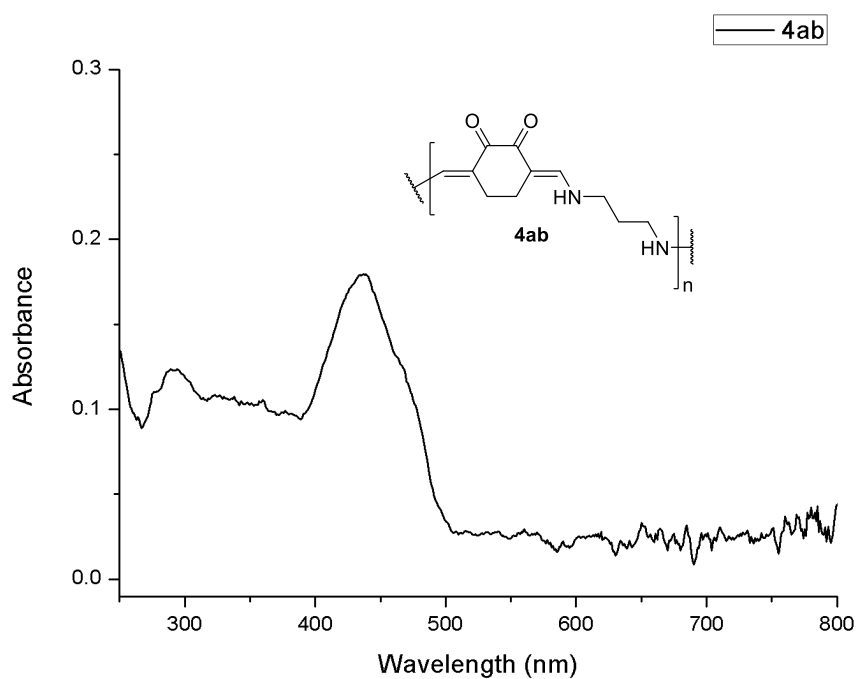

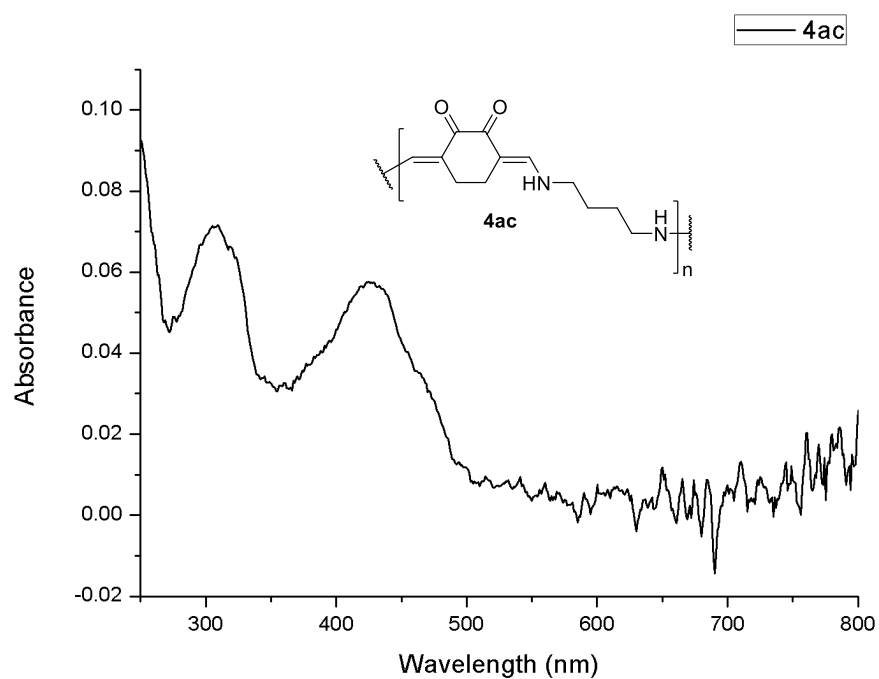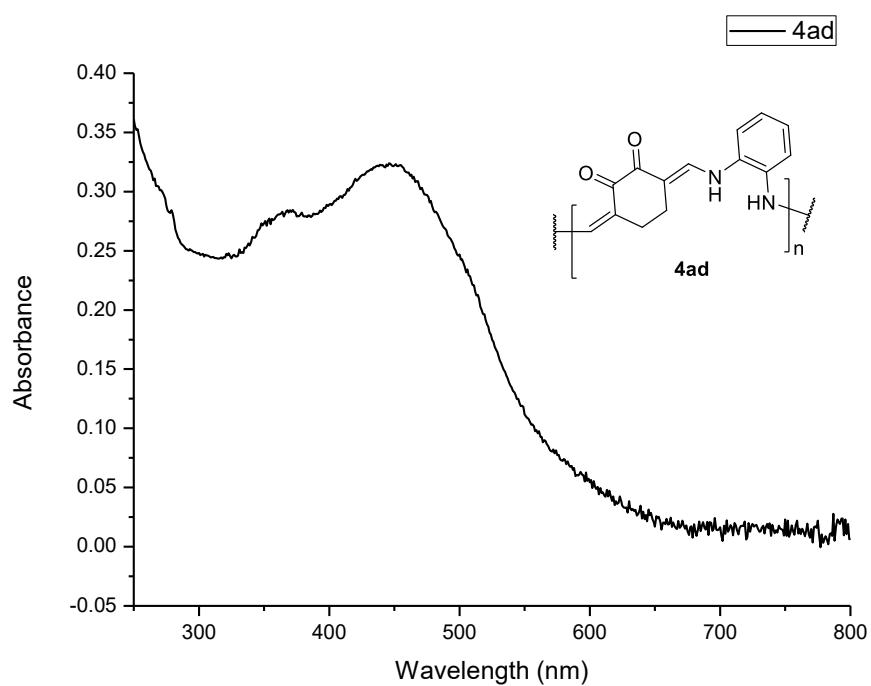

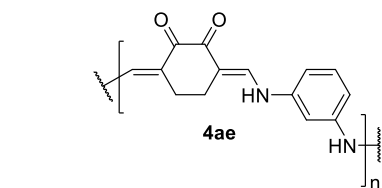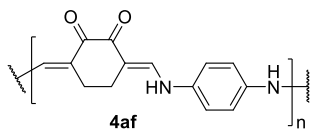

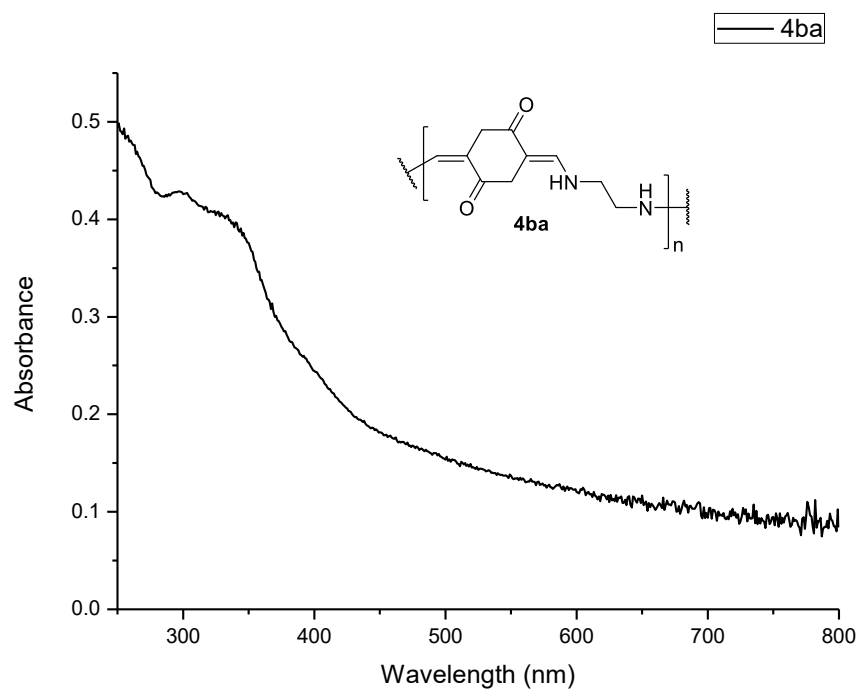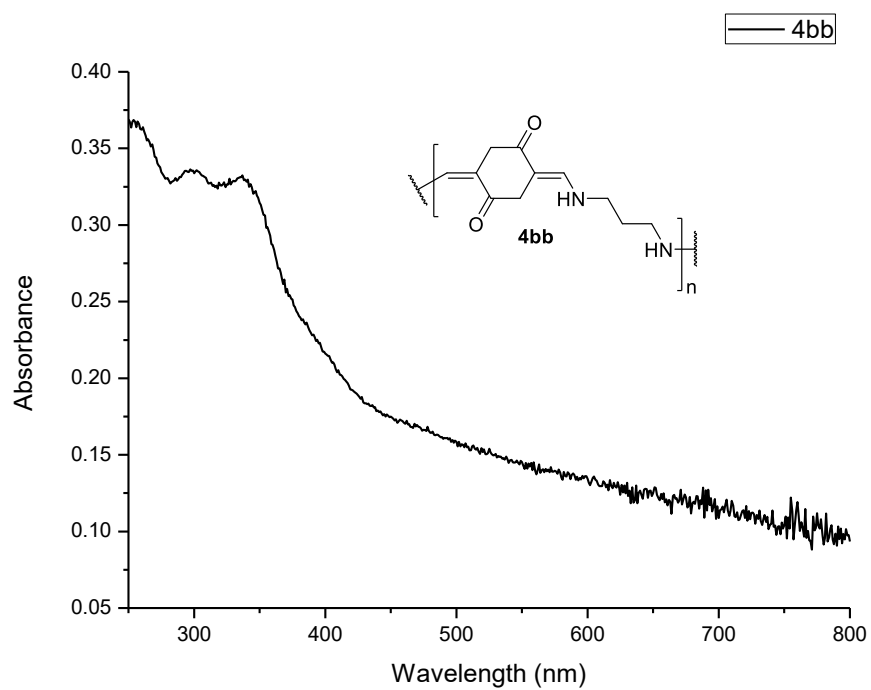

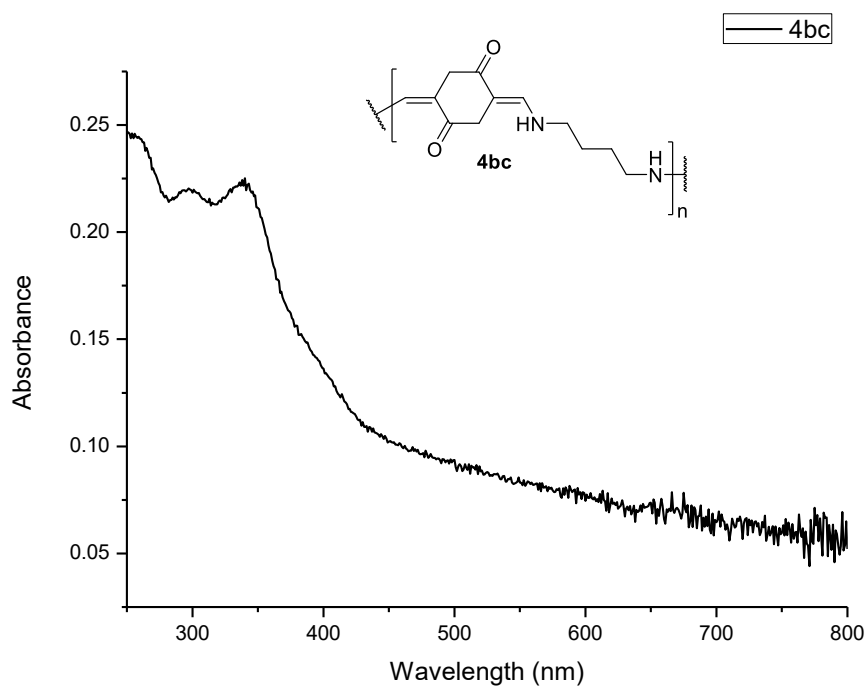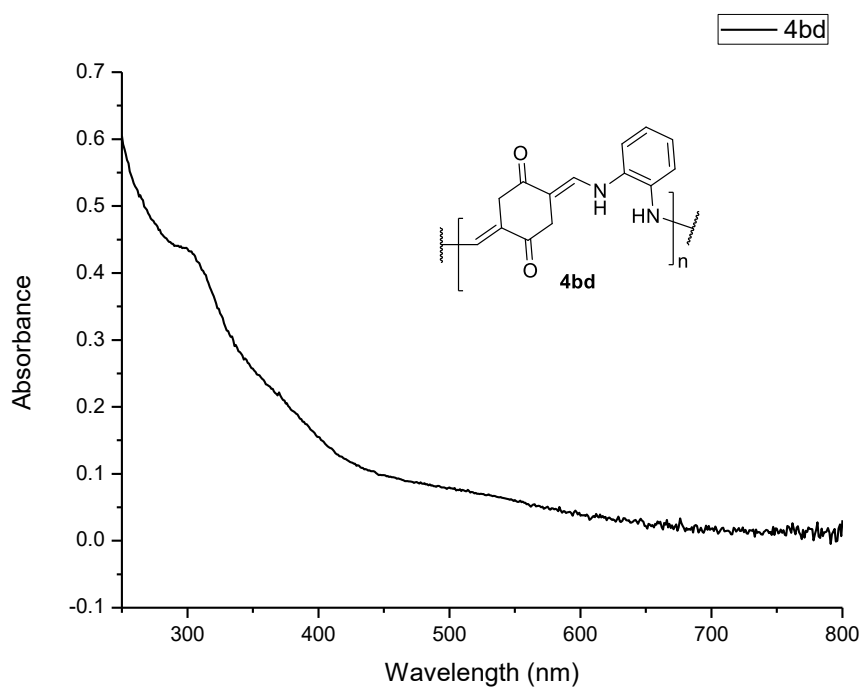

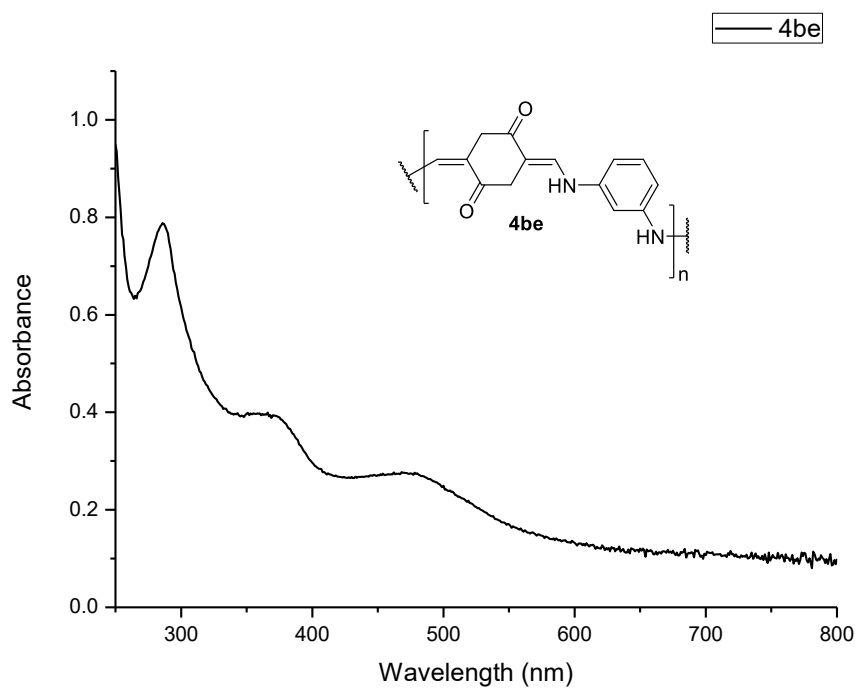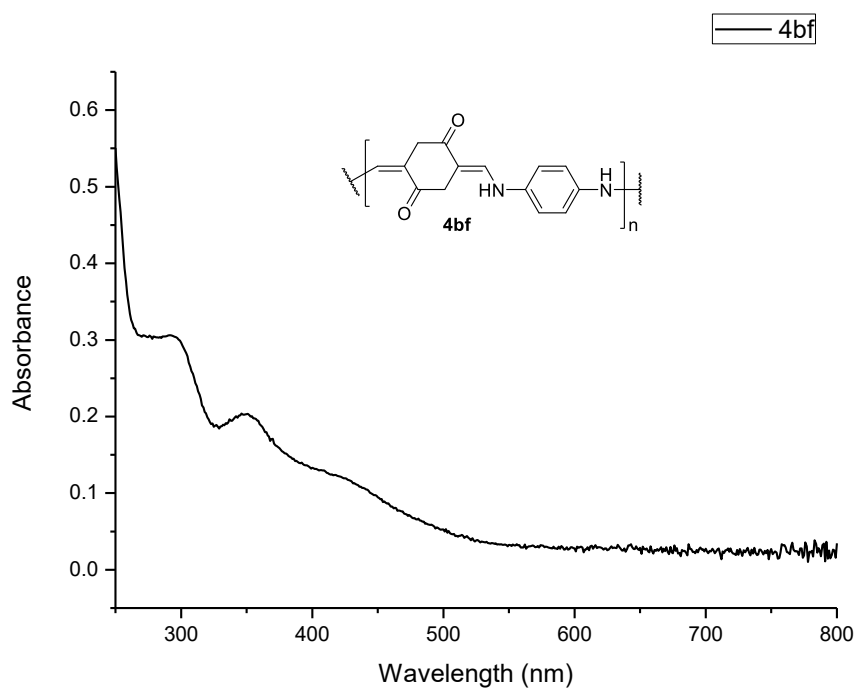

Supplement: s1 [file s1]
